# Supplementary material
Source: publisher figshare collection journal article supplement (https://acs.figshare.com/ndownloader/files/13329539)
Supplement: Supplementary file 1 [file 13329539]

# **Ion Transport through Perforated Graphene**

## **Supporting Information**

Mandakranta Ghosh, Koen F. A. Jorissen, Jeffery A. Wood, and Rob G. H. Lammertink\*

Soft matter, Fluidics and Interfaces, Faculty of Science and Technology, University of Twente, Enschede, The Netherlands

E-mail: [r.g.h.lammertink@utwente.nl](mailto:r.g.h.lammertink@utwente.nl)

**A. Picture of membrane and the experimental setup:**

**A1. Picture of the membrane before and after etching:**

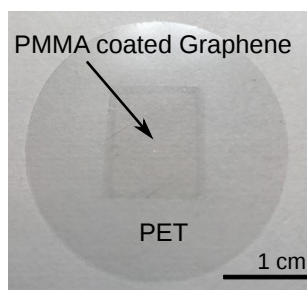

Figure S1. PMMA coated graphene membrane transferred on to 13  $\mu\text{m}$  PET support.

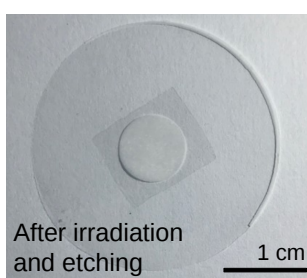

Figure S2. Graphene membrane after irradiation, etching and PMMA removal.

**A2. Picture of the holders:**

Graphene is placed between the holders and sealed with O rings as shown in Figure S3.

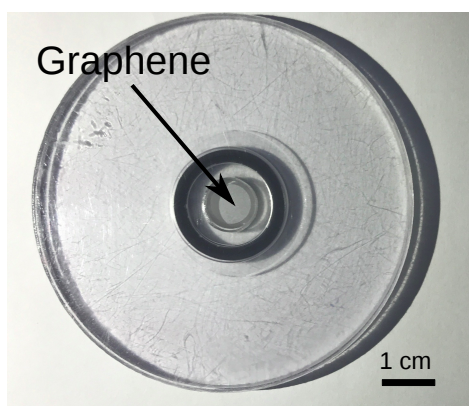

Figure S3: Holders that graphene is placed between.

### A3. Picture of measurement setup.

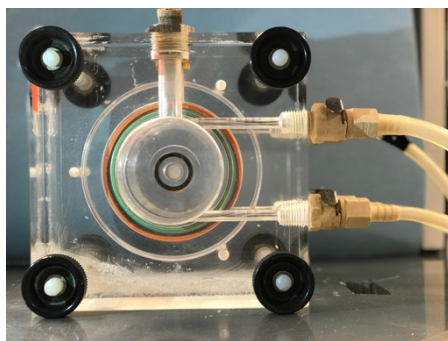

Figure S4. Front view of the experimental setup. Graphene is placed between the reservoirs using the holders.

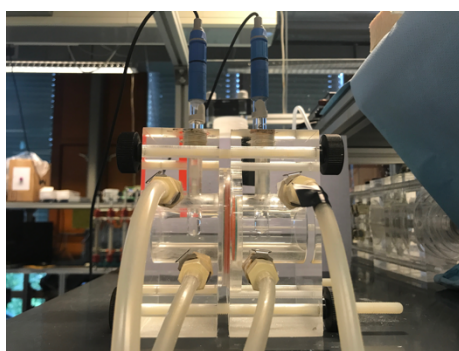

Figure S5. Side view of the setup. Two inlets and outlets are used to circulate water inside the reservoirs. Electrodes are placed on both sides of the membrane at an equal distance.

### B) Experimental result for PET membranes without any graphene on top:

We have measured the potential of a PET membrane irradiated with the same fluence and etched in the same condition as that of the graphene membrane mentioned in the paper. The result is shown in Figure S6. We have done our measurement with three different salts (KCl, LiCl,  $K_2SO_4$ ), we have used for the experiment with the composite Graphene/PET membrane. We have observed that for KCl the membrane potential is around zero which implies that the PET membrane is not selective for  $K^+$  ions. The positive value of membrane potential for  $K_2SO_4$  is due the diffusion potential generated for fast moving  $K^+$  ions than  $SO_4^{2-}$  ions and the negative value of membrane potential for LiCl is due to diffusion potential generated due to the fast-moving  $Cl^-$  ions than the  $Li^+$  ions. The potential remains steady with time. This result confirms that the selectivity we have observed in our membrane is appearing only do to the graphene membrane and PET pores have no influence on ion transport through the graphene nanopores.

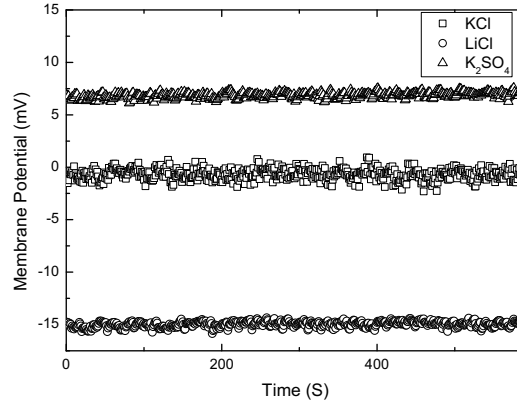

Figure S6. Membrane potential for PET is measured with respect to time for KCl, LiCl and  $K_2SO_4$ .

### C) TMS equation for 1:2 salt:

The dimensionless membrane potential for is expressed as<sup>1</sup>

$$\Delta\bar{\psi}_{TMS} = \frac{1}{z_2} \ln \frac{k_2^P}{k_2^f} + \frac{\bar{u}_+ - \bar{u}_-}{z_2\bar{u}_- - z_1\bar{u}_+} \ln\left(\frac{T_r k_2^P + t_1 \zeta_f}{k_2^f + t_1 \zeta_f}\right)$$

Where,

$$\Delta\bar{\psi} = \frac{F\Delta\psi}{RT}, \quad t_1 = \frac{|z_1|\bar{u}_+}{|z_1|\bar{u}_+ + |z_2|\bar{u}_-}, \quad \zeta_f = \frac{\bar{c}_R}{|z_1|v_1 c_f}, \quad T_r = \frac{c_p}{c_f}$$

$z_i$  is the electrochemical valence,  $\bar{u}_+$  is the diffusion coefficient of cations and  $\bar{u}_-$  is the diffusion coefficient of anions and  $k_i$  is the partition coefficient of ion  $i$ .  $T_r$  is the transmission, which denotes the ability of solute to pass through the membrane.  $v_i$  is the stoichiometric coefficient of electrolyte, 1 represents counter ions.

$\zeta_{f(p)}$  is the ratio of the volume charge density to equivalent salt concentration in the feed side or in the permeate side of membrane.  $F$  is the Faraday constant,  $R$  is the gas constant and  $T$  is the temperature.

$\Delta\psi$  is the membrane potential

$\Delta\bar{\psi}$  is the dimensionless form of the membrane potential.

$\bar{c}_R$  is the constant volume charge density of charged membrane (mole/l of pore volume).

$c_f$  is the high concentration and  $c_p$  is the low concentration.

For, 1:2 asymmetric salt, the partition coefficient of co-ions can be expressed as,

$$k_2^{p(f)} = [\Gamma_{1:2,p(f)}^-]^{-2},$$

$$\Gamma_{1:2,p(f)}^- = \left[ \frac{\Lambda(1, 1, \zeta_{p(f)})^{1/3}}{6} - \frac{2\zeta_{p(f)}}{\Lambda(1, 1, \zeta_{p(f)})^{1/3}} \right]^{-1}$$

where,

$$\Lambda(1, 1, \zeta_{p(f)}) = 108 + 12\sqrt{3}\sqrt{(27 + 4\zeta_{p(f)}^3)}$$

#### D) TEM image of graphene pore:

The TEM image in Figure S7 shows a hole of  $\sim 9$  nm diameter. This confirms our estimated pore size, at least as order of magnitude.

We found this pore at the location where a PET pore is located. Graphene pore is expected to be found at that location.

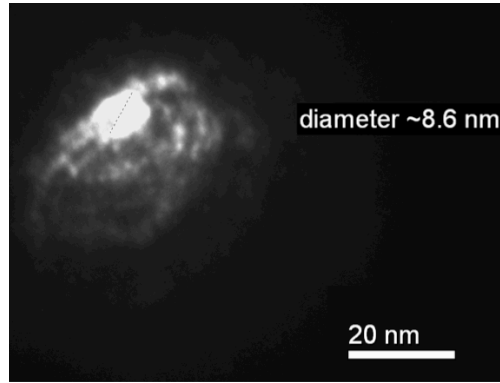

Figure S7: TEM image of graphene nanopore.

#### References:

(1) Shang, W. J.; Wang, X. L.; Yu, Y. X. Theoretical Calculation on the Membrane Potential of Charged Porous Membranes in 1-1, 1-2, 2-1 and 2-2 Electrolyte Solutions. *J. Membr. Sci.* **2006**, 285, 362–375.
